# Supplementary material
Source: ML conference proceedings conference paper supplement (https://openaccess.thecvf.com/content/WACV2022/html/Hong_DAQ_Channel-Wise_Distribution-Aware_WACV_2022_paper.html)
Supplement: Supplementary file 1 [file Hong_DAQ_Channel-Wise_Distribution-Aware_WACV_2022_supplemental.pdf]

# DAQ: Channel-Wise Distribution-Aware Quantization for Deep Image Super-Resolution Networks

## – *Supplementary Document* –

Cheeun Hong\*    Heewon Kim\*    Sungyong Baik    Junghun Oh    Kyoung Mu Lee

Department of ECE, ASRI, Seoul National University

{cheeun914, ghimhw, dsybaik, dh6dh, kyoungmu}@snu.ac.kr

### A. Implementation details on computation cost

In the main paper, computational resources (BOPs and estimated energy consumption) are measured with respect to quantization bit-width, considering the overflow of low-bit arithmetic operations. Overflow occurs when an arithmetic operation attempts to create a numeric value that is outside the range that can be possibly represented. Taking integer overflow into account is especially essential in low-bit networks, since the output ranges of low-bit multiplication and addition are strictly limited. Various techniques are used to avoid the integer overflow, such as using the overflow checker or value sanity testing. For ultra-low precision operations where the integer overflow is highly likely to occur, we design an appropriate large bit-width for each operation, under the assumption of an integer overflow. For instance, when the sum is accumulated over vector of size  $C$  with each  $n$ -bit element, the output buffer is  $n + \log_2(C-1)$ -bit. Also, the output buffer for multiplication of two  $n$ -bit elements is  $(2n-1)$ -bit.

### B. Derivation of convolution operations for DAQ

Section 3.3 in the main paper claims that quantization can step forward to hardware efficiency simply by postponing the de-transformation process as late as possible (See Equation (B), (D), and (G)). As more operations are done before de-transformation, in other words, in the state of real integer, the more efficient the quantization becomes.

Section 3.2 of the main paper presents a convolution operation with a  $n$ -bit *channel-wise* quantized feature map and a  $n$ -bit layer-wise quantized weight tensor. Given a feature map  $\mathbf{x} \in \mathbb{R}^{C \times H \times W}$ ,  $c$ -th channel,  $j, k$ -th element of the feature map is denoted as  $x_c[j, k]$  with the indexing operator  $[\cdot, \cdot]$ . Given a weight  $\mathbf{w} \in \mathbb{R}^{C \times C_{out} \times K \times K}$ ,  $c$ -th input channel and  $i, u, v$ -th element of a part of weight tensor  $\mathbf{w} \in \mathbb{R}^{C \times C_{out} \times K \times K}$  is denoted as  $w_c[i, u, v]$  with indexing operator  $[\cdot, \cdot, \cdot]$ . Then, the output response  $\mathbf{y} \in \mathbb{R}^{C_{out} \times H \times W}$  is the output of convolution between the given feature map and the weight in a sliding window manner. The  $i, j, k$ -th element of the output response is formulated as follows:

$$y[i, j, k] = \sum_{c=1}^C \sum_{u=1}^K \sum_{v=1}^K x_c[u+j, v+k] \cdot w_c[i, u, v]. \quad (\text{A})$$

For simplicity, we drop the index subscript in the following equations to denote  $x_c[u+j, v+k]$  as  $x_c$  and  $w_c[i, u, v]$  as  $w_c$ . From our proposed quantization method, convolution with floating-point values can be approximated with low-precision values, as follows:

$$y[i, j, k] \approx \sum_{c=1}^C \sum_{u=1}^K \sum_{v=1}^K x_c^q \cdot w_c^q \quad (\text{B})$$

$$= \sum_{c=1}^C \sum_{u=1}^K \sum_{v=1}^K (\sigma_{cs}(n) \cdot \hat{x}_c^q + \mu_c) \cdot (\sigma_{ws}(n) \cdot \hat{w}_c^q) \quad (\text{C})$$

---

\*equal contribution

$$= \sigma_w s(n)^2 \sum_{c=1}^C \sigma_c \cdot \sum_{u=1}^K \sum_{v=1}^K \hat{x}_c^q \cdot \hat{w}_c^q + \sigma_w s(n) \sum_{c=1}^C \mu_c \sum_{u=1}^K \sum_{v=1}^K \hat{w}_c^q. \quad (\text{D})$$

Likewise overview Figure 3 in the main paper, the channel-wise de-transformation (see Equation (D)) derived from the procedure with element-wise de-transformation (see Equation (B)) can reduce costly operations with floating-point values. Although the computation costly operation of element-wise de-transformation is largely reduced in Equation (D), it still bears computational overhead, by operating the channel-wise summation in floating-point values (due to floating-point de-transformation parameters  $\mu_c$  and  $\sigma_c$ ). To alleviate this issue, main paper presents a scheme of quantizing quantization transformation parameters of  $\boldsymbol{\mu} \in \mathbb{R}^C$  and  $\boldsymbol{\sigma} \in \mathbb{R}^C$ , to approximate  $\mu_c$  and  $\sigma_c$  by using the distribution statistics of  $\boldsymbol{\mu}$  and  $\boldsymbol{\sigma}$ . From Equation 4, 5, 6 of the main paper, Equation (D) can be approximated as follows:

$$\approx \sigma_w s(n)^2 \sum_{c=1}^C \sigma_c^q \cdot \sum_{u=1}^K \sum_{v=1}^K \hat{x}_c^q \cdot \hat{w}_c^q + \sigma_w s(n) \sum_{c=1}^C \mu_c^q \sum_{u=1}^K \sum_{v=1}^K \hat{w}_c^q \quad (\text{E})$$

$$= \sigma_w s(n)^2 \sum_{c=1}^C (\sigma_\sigma s(m) \cdot \hat{\sigma}_c^q + \mu_\sigma) \cdot \sum_{u=1}^K \sum_{v=1}^K \hat{x}_c^q \cdot \hat{w}_c^q + \sigma_w s(n) \sum_{c=1}^C (\sigma_\mu s(m) \cdot \hat{\mu}_c^q + \mu_\mu) \sum_{u=1}^K \sum_{v=1}^K \hat{w}_c^q \quad (\text{F})$$

$$= \sigma_w s(n)^2 \sigma_\sigma s(m) \sum_{c=1}^C \hat{\sigma}_c^q \sum_{u=1}^K \sum_{v=1}^K \hat{x}_c^q \cdot \hat{w}_c^q + \sigma_w s(n)^2 \mu_\sigma \sum_{c=1}^C \sum_{u=1}^K \sum_{v=1}^K \hat{x}_c^q \cdot \hat{w}_c^q \quad (\text{G})$$

$$+ \sigma_w s(n) \sigma_\mu s(m) \sum_{c=1}^C \hat{\mu}_c^q \sum_{u=1}^K \sum_{v=1}^K \hat{w}_c^q + \sigma_w s(n) \mu_\mu \sum_{c=1}^C \sum_{u=1}^K \sum_{v=1}^K \hat{w}_c^q.$$

The floating-point channel-wise summation (see Equation (D)) is replaced with lower-precision channel-wise summation (see Equation (G)). As shown in Table A, simply changing the operation order from Equation (A) to Equation (D) reduces the BOPs largely from 174T to 10T. Furthermore, **quantizing quantization transformation parameters (QQ)** in Equation (D) results in Equation (G), which further reduces the BOPs to 3T with 4-bit for QQ.

Table A: Computational cost comparison of a 2-bit (w2a2) channel-wise quantized convolution.  $C=C_{out}=256$ ,  $K=3$ ,  $(H, W)=(480, 270)$

| De-transformation |    | Eqn.     | Number of ( $n$ -bit, $m$ -bit) operations |         |        |        |        |          |          |          | BOPs    |
|-------------------|----|----------|--------------------------------------------|---------|--------|--------|--------|----------|----------|----------|---------|
| Type              | QQ |          | (2, 2)                                     | (3, 3)  | (6, 4) | (6, 6) | (9, 9) | (14, 32) | (17, 32) | (32, 32) |         |
| Element-wise      | ✗  | Eqn. (B) | -                                          | -       | -      | -      | -      | -        | -        | 169937M  | 174015G |
| Channel-wise      | ✗  | Eqn. (D) | 76441M                                     | 67948M  | -      | 8493M  | -      | 8493M    | -        | 8493M    | 10108G  |
| Channel-wise      | ✓  | Eqn. (G) | 152882M                                    | 135895M | 8493M  | 8493M  | 8460M  | 33M      | 33M      | 66M      | 3046G   |

## C. Additional experiments

### C.1. Comparison with SotA methods

Existing state-of-the-art quantized SR networks [23, 41] involve a specialized architecture or an ad-hoc training scheme for low precision SR networks, mostly concentrated on binary precision. BTM [23] exploits a new training scheme like knowledge distillation and specialized gradient update rule instead of the traditional straight-through estimator [46]. BAM [41] designs a new binarized SR network, namely BSRN, utilizing a bit accumulation module.

Our proposed quantization method is orthogonal to these techniques. EDSR-BTM and BSRN-BAM are re-implemented according to the respective paper, and we replace the typical quantization (binarization) function with our distribution-aware channel-wise quantization (DAQ) function. The re-implemented architectures and the DAQ-applied architectures are respectively trained with batch size 4 and other settings same as the baseline in each paper. Despite the channel-wise overhead, our proposed method DAQ gives clear auxiliary gain in performance, for about 0.3 dB in Set5, as shown in Table B.

Table B: Comparisons on existing low-precision SR networks, EDSR-BTM and BSRN-BAM of scale 4.

| Method              | Precision |   | BOPs   | Energy   | Parameters | PSNR (dB) |       |       |          |
|---------------------|-----------|---|--------|----------|------------|-----------|-------|-------|----------|
|                     | w         | a |        |          |            | Set5      | Set14 | B100  | Urban100 |
| EDSR-BTM [23]       | 1         | 1 | 23.1 T | 52.8 mJ  | 43.1M      | 31.30     | 28.05 | 27.22 | 25.08    |
| EDSR-BTM [23] - DAQ | 1         | 1 | 75.1 T | 138.9 mJ | 43.1M      | 31.60     | 28.19 | 27.34 | 25.30    |
| BSRN-BAM [41]       | 1         | 1 | 2.9 T  | 8.5 mJ   | 1.2M       | 31.17     | 27.94 | 27.15 | 25.01    |
| BSRN-BAM [41] - DAQ | 1         | 1 | 7.2 T  | 23.7 mJ  | 1.2M       | 31.44     | 28.03 | 27.21 | 25.05    |

### C.2. SR Networks with batch normalization layers

In the main paper, we made a comparison with quantization methods without retraining. Among the compared methods, DFQ [37] utilizes batch normalization (BN) parameters to further improve the quantization accuracy. However, the comparison backbone of Table 3, EDSR [31] removed the BN layers for improved performance, followed by several other SR networks. For further fair comparison with DFQ, we compare the quantization methods without retraining, on EDSR *with* BN. Table C shows that our method outperforms DFQ regardless of BN layers.

Table C: Comparison of quantization methods *without retraining* on pre-trained EDSR *with* BN of scale 4.

| Method            | Precision |    | BOPs<br>(HD image) | Energy<br>(HD image) | PSNR<br>(Urban100) |
|-------------------|-----------|----|--------------------|----------------------|--------------------|
|                   | w         | a  |                    |                      |                    |
| EDSR w/ BN        | 32        | 32 | 10025.8 T          | 22516.0 mJ           | 26.04 dB           |
| EDSR w/ BN - LinQ | 4         | 4  | 357.8 T            | 378.4 mJ             | 22.79 dB           |
| EDSR w/ BN - DFQ  | 4         | 4  | 364.3 T            | 390.1 mJ             | 23.07 dB           |
| EDSR w/ BN - DAQ  | 2         | 2  | 213.4 T            | 333.5 mJ             | <b>24.53 dB</b>    |
